# Supplementary material for: Triphenylphosphonium conjugated quaternary ammonium based gel: synthesis and potential application in the efficient removal of toxic acid orange 7 dye from aqueous solution
Source: Royal Society of Chemistry journal article supplement (doi:10.1039/d0nj02138e), 2020-01-01
Supplement: d0nj02138e1.pdf [file d0nj02138e1.pdf]

**Electronic Supporting Information**  
**for**  
**Triphenylphosphonium conjugated quaternary ammonium based gel: synthesis and**  
**potential application in efficient removal of toxic acid orange 7 dye from aqueous**  
**solution**

Sayantani Bhattacharya, Diptendu Patra and Raja Shunmugam\*

Polymer Research Centre, Department of Chemical Sciences and Centre for Advanced  
Functional Materials, Indian Institute of Science Education and Research Kolkata, Mohanpur,  
West Bengal, 741246, India

\*E-mail: sraja@iiserkol.ac.in

| <b>Sl no.</b> | <b>Contents</b>                                                                                            | <b>Page no.</b> |
|---------------|------------------------------------------------------------------------------------------------------------|-----------------|
| 1             | Experimental Section                                                                                       | S3              |
| 2             | Figure S1: <sup>1</sup> H NMR spectrum of compound 3                                                       | S5              |
| 3             | Figure S2: <sup>1</sup> H NMR spectrum of compound 4                                                       | S5              |
| 4             | Figure S3: <sup>13</sup> C NMR spectrum of compound 4                                                      | S6              |
| 5             | Figure S4: ESI-MS of compound 4                                                                            | S6              |
| 6             | Figure S5: <sup>1</sup> H NMR spectrum of compound 5                                                       | S7              |
| 7             | Figure S6: <sup>13</sup> C NMR spectrum of compound 5                                                      | S7              |
| 8             | Figure S7: <sup>31</sup> P NMR spectrum of compound 5                                                      | S8              |
| 9             | Figure S8: ESI-MS of compound 5                                                                            | S8              |
| 10            | Figure S9: <sup>1</sup> H NMR spectrum of compound 6                                                       | S9              |
| 11            | Figure S10: <sup>13</sup> C NMR spectrum of compound 6                                                     | S9              |
| 12            | Figure S11: <sup>31</sup> P NMR spectrum of compound 6                                                     | S10             |
| 13            | Figure S12: ESI-MS of compound 6                                                                           | S10             |
| 14            | Figure S13: Differential Scanning Calorimetry of TPP gel for a) heating and b) cooling cycle respectively. | S11             |
| 15            | Figure S14: FE-SEM image of as prepared TPP gel                                                            | S11             |
| 16            | Figure S15: Hansen solubility parameter of the solvents                                                    | S12             |

|    |                                                                                                                                                                                  |     |
|----|----------------------------------------------------------------------------------------------------------------------------------------------------------------------------------|-----|
|    | used.                                                                                                                                                                            |     |
| 16 | Figure S16: pHzpc data of the TPP gel.                                                                                                                                           | S12 |
| 17 | Equation S1: Formula for dye adsorption                                                                                                                                          | S13 |
| 18 | Table S1. Adsorption capacity of different chemical adsorbents for the removal of azo dyes as recognised by their maximum adsorption capacity (mg of dye/g of adsorbent)         | S13 |
| 19 | Table S2. Adsorption capacity of different bio-adsorbents for the removal of azo dye acid orange 7 as recognised by their maximum adsorption capacity (mg of dye/g of adsorbent) | S14 |
| 20 | References                                                                                                                                                                       | S14 |

## **Experimental Section:**

### **Instrumentation Techniques:**

**Nuclear Magnetic Resonance (NMR):** The  $^1\text{H}$ ,  $^{13}\text{C}$  and  $^{31}\text{P}$  NMR spectroscopy was carried out on a BRUKER 500 MHz spectrometer using  $\text{CDCl}_3$ ,  $\text{DMSO}-d_6$ , and  $\text{D}_2\text{O}$  as solvents.  $^1\text{H}$  NMR spectra were calibrated to tetramethylsilane as internal standard ( $\delta_{\text{H}}$  0.00).

**Fourier Transform Infra -Red (FT-IR):** FT-IR spectra were obtained on FT-IR Perkin-Elmer spectrometer at a nominal resolution of  $2\text{ cm}^{-1}$ .

**ESI-MS:** HRMS analyses were performed with Q-TOF YA263 high resolution (Waters Corporation) instruments by +ve mode electrospray ionization.

**Rheometer:** The rheological measurements were carried out on a TA-ARG2 rheometer using a steel parallel plate with 60 mm diameter at  $25\text{ }^\circ\text{C}$  with 1.0 mm Gap spacing for all gel samples. The dynamic shear moduli ( $G'$  and  $G''$ ) were recorded in the linear viscoelastic regime at a strain of  $\gamma = 1\%$  as a function of angular frequency (0.1–100 rad/s).

**UV-Vis Spectroscopy:** UV-visible absorption measurements were carried out on U-4100 spectrophotometer; HITACHI spectrometer, with a scan rate of 500 nm/min.

**Scanning Electron Microscopy (SEM):** High resolution SEM was performed on a Zeiss microscope; SUPRA 55VP-Field Emission Scanning Electron Microscope. High performance variable pressure FE-SEM with patented GEMINI column technology. Schottky type field emitter system, single condenser with crossover-free beam path. Resolution: 1.0 nm at 15 kV; 1.6 nm at 1 kV high vacuum mode. 2.0 nm at 30 kV at variable pressure mode.

**Thermo Gravimetric Analysis:** Thermal studies were carried out using a Mettler Toledo TGA/SDTA 851e instrument at a heating rate of  $10\text{ }^\circ\text{C min}^{-1}$ .

**Transmission Electron Microscopy:**

The gels were sliced at 30 nm thick films using microtome facility (Power Tome PC, RMC Boeckeler). The sliced film was dried under vacuum and was analysed using Transmission Electron Microscope; TEM (JEM-2100F) facility at 120 kV.

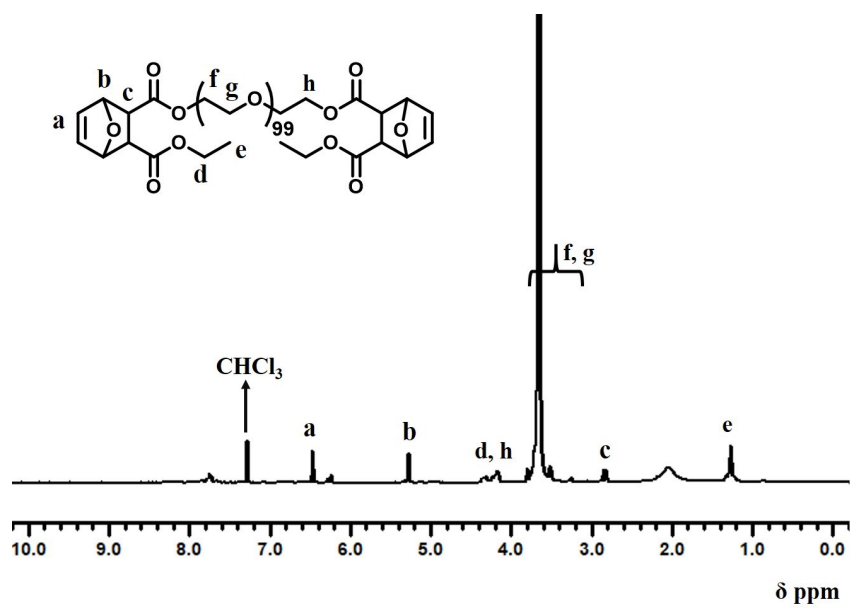

Figure S1:  $^1\text{H}$  NMR spectrum of compound 3 in  $\text{CDCl}_3$

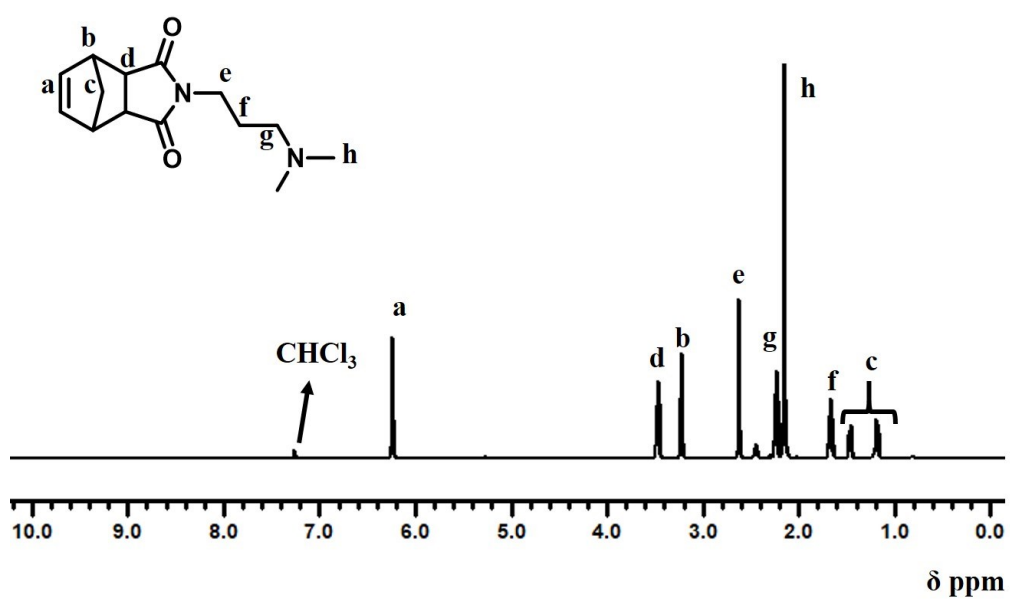

Figure S2:  $^1\text{H}$  NMR spectrum of compound 4 in  $\text{CDCl}_3$

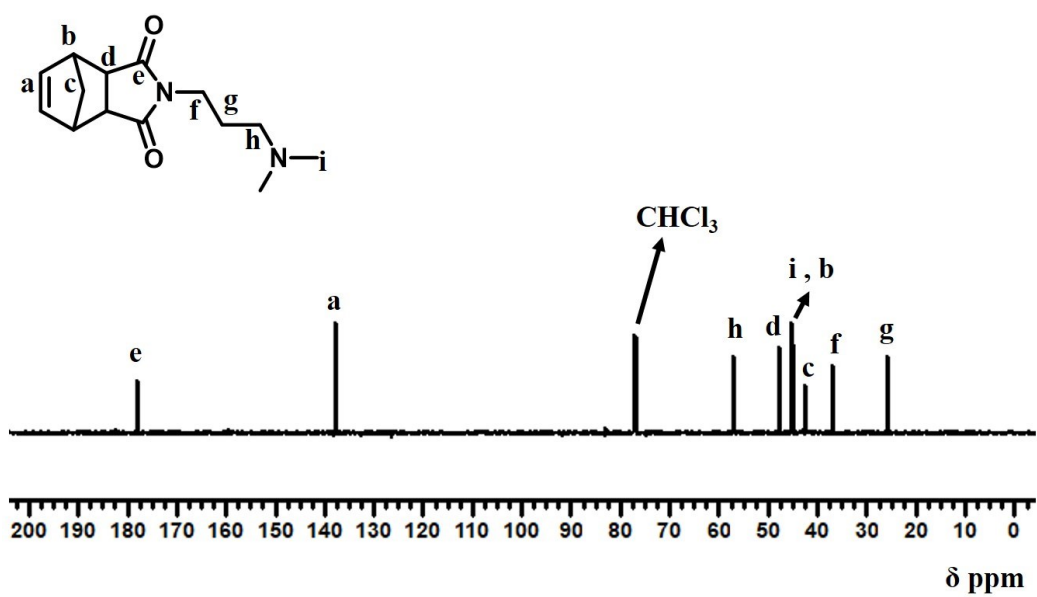

Figure S3:  $^{13}\text{C}$  NMR spectrum of compound 4 in  $\text{CDCl}_3$

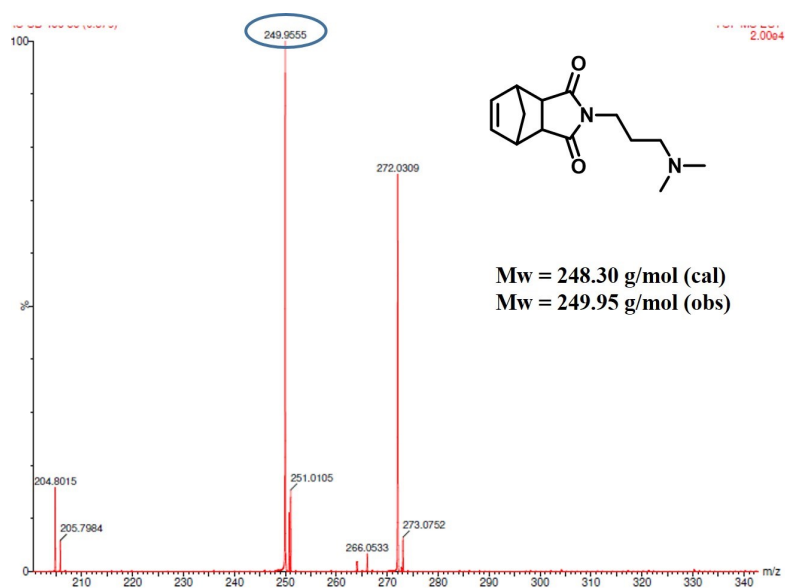

Figure S4: ESI-MS of compound 4 confirming its formation

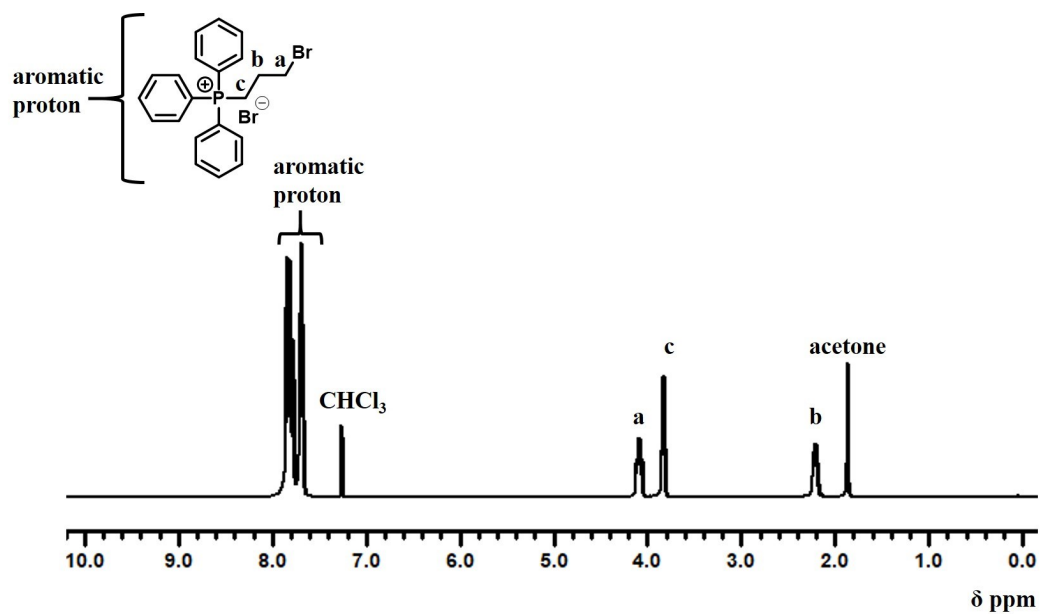

Figure S5:  $^1\text{H}$  NMR spectrum of compound 5 in  $\text{CDCl}_3$

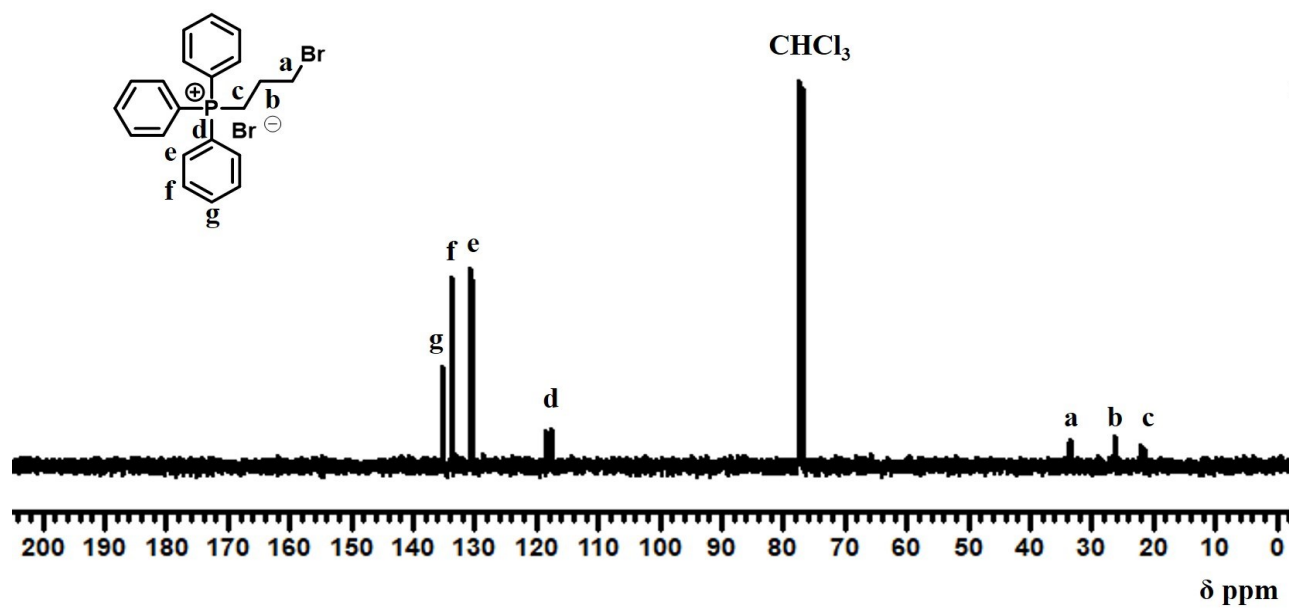

Figure S6:  $^{13}\text{C}$  NMR spectrum of compound 5 in  $\text{CDCl}_3$

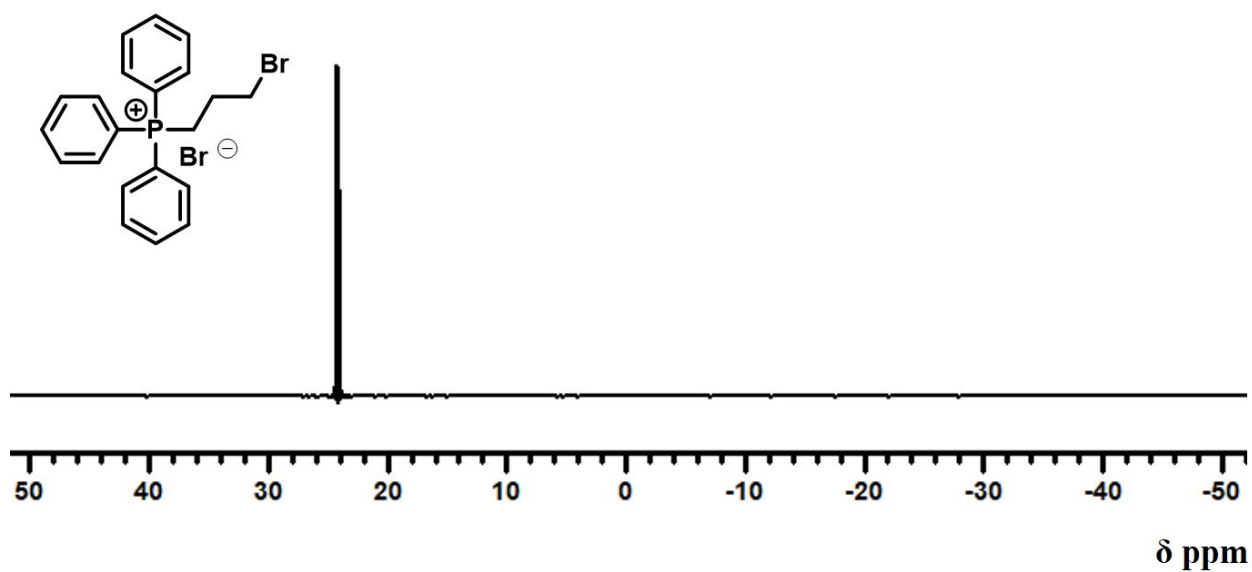

Figure S7:  $^{31}\text{P}$  NMR of compound 5 in  $\text{CDCl}_3$

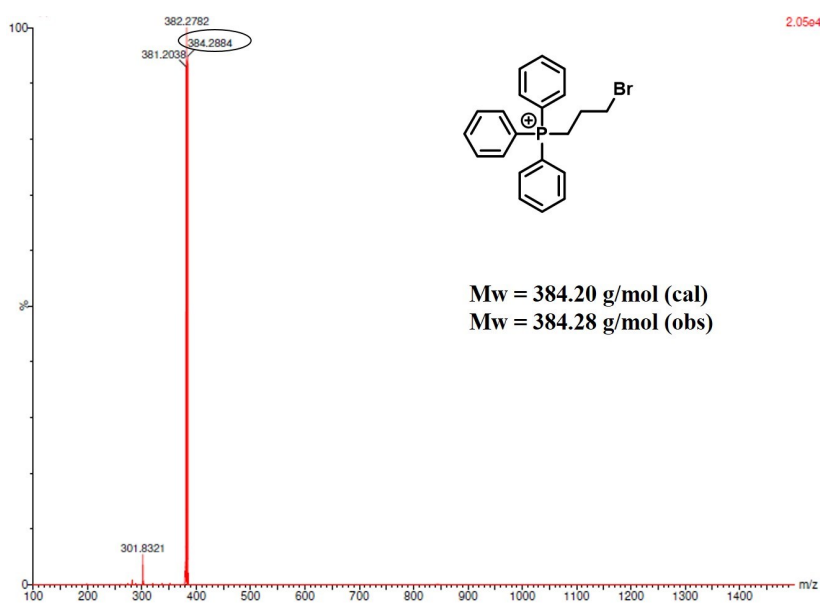

Figure S8: ESI-MS of compound 5 confirming its formation



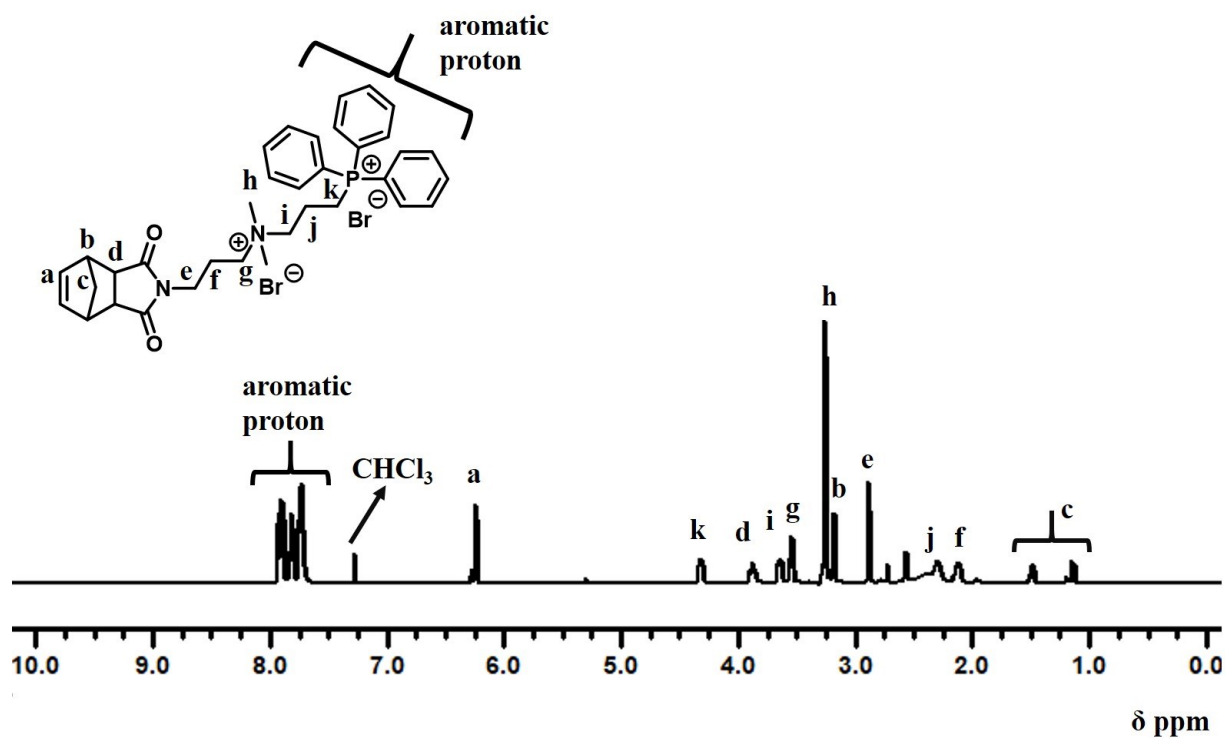

Figure S9:  $^1\text{H}$  NMR spectrum of compound 6 in  $\text{CDCl}_3$

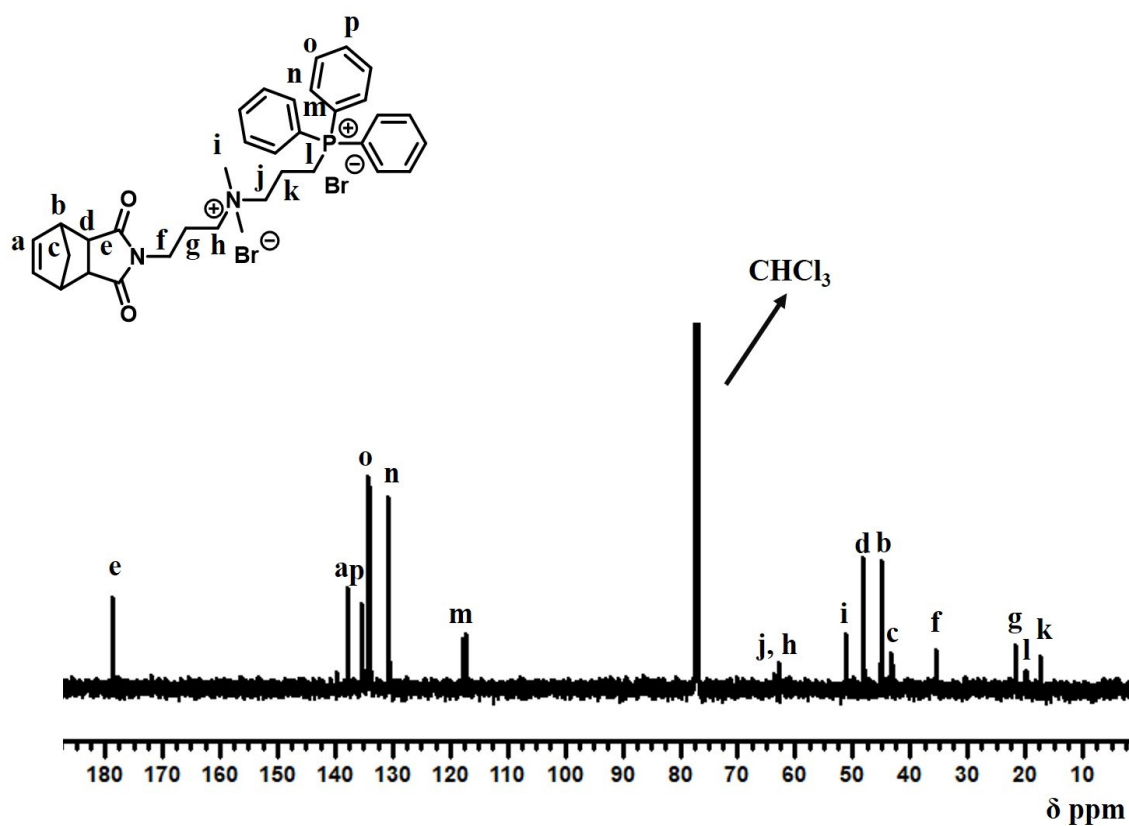

Figure S10:  $^{13}\text{C}$  NMR spectrum of compound 6 in  $\text{CDCl}_3$

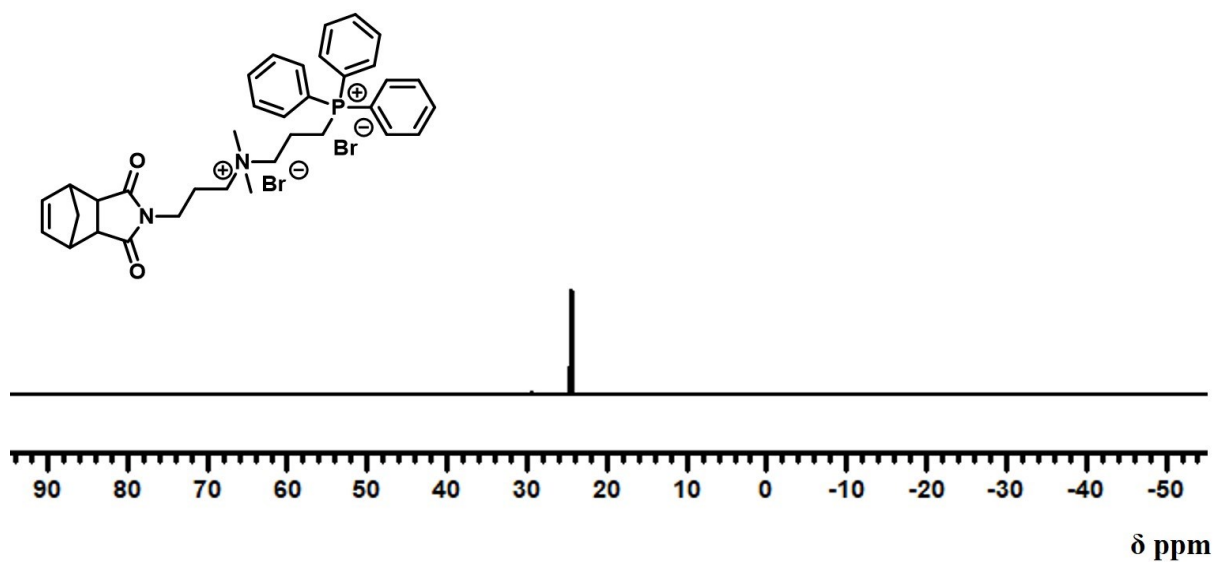

Figure S11:  $^{31}\text{P}$  NMR of compound 6 in  $\text{CDCl}_3$

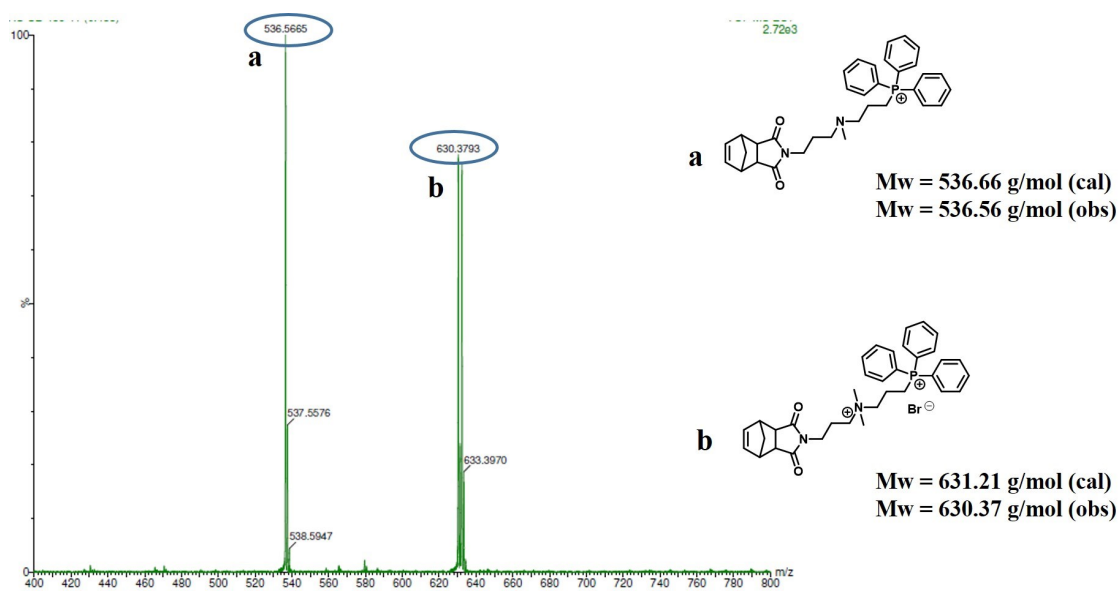

Figure S12: ESI-MS of compound 6 confirming its formation

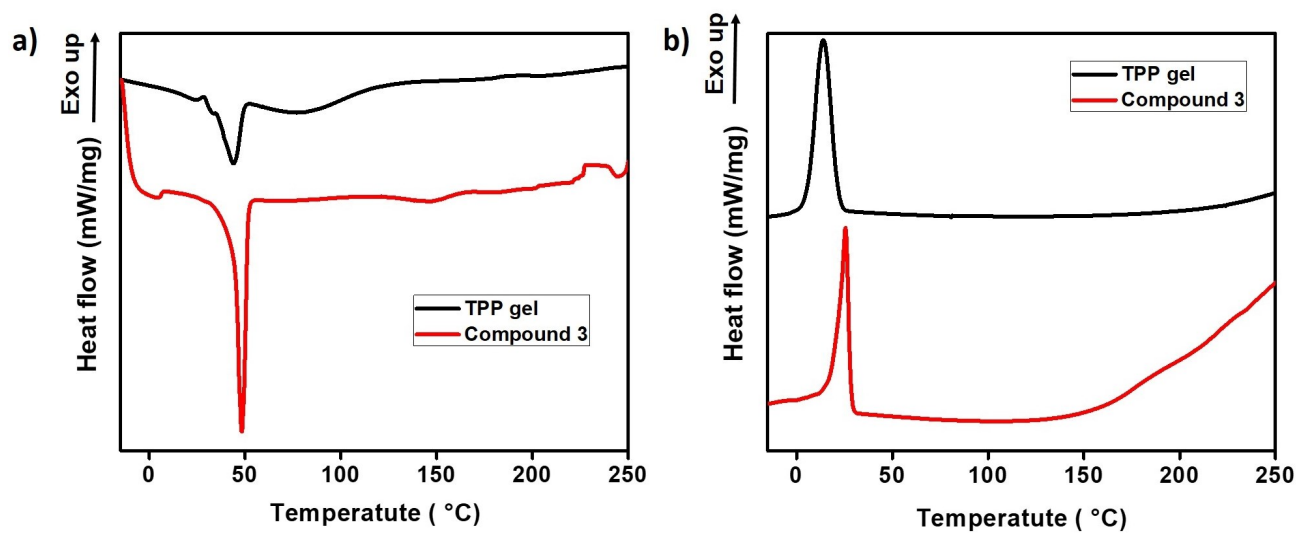

Figure S13: Differential Scanning Calorimetry of Compound 3 and TPP gel for a) heating and b) cooling cycle respectively.

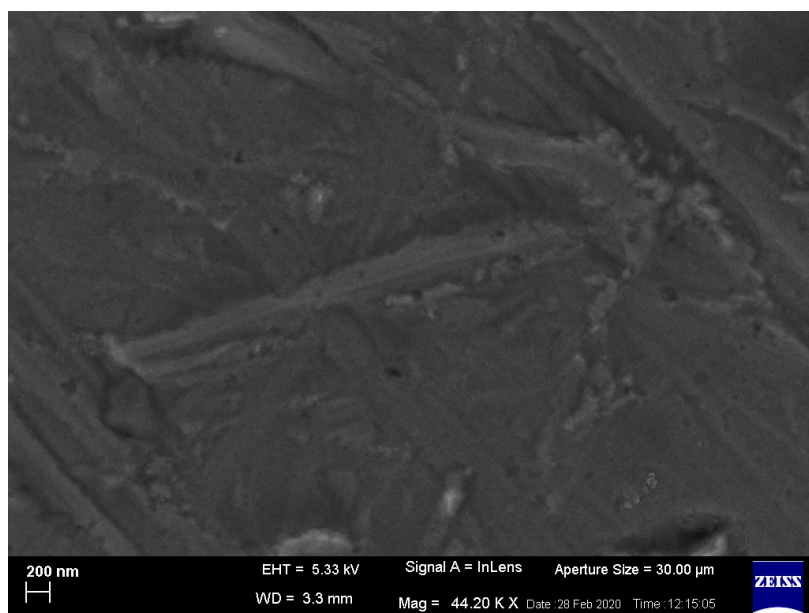

Figure S14: FE-SEM image of the as prepared TPP gel.

| Solvent      | Solubility parameter,<br>$\delta_{\text{solvent}} \text{ (cal cm}^{-3}\text{)}^{1/2}$ |
|--------------|---------------------------------------------------------------------------------------|
| Water        | 23.40                                                                                 |
| DMSO         | 13.03                                                                                 |
| DMF          | 12.14                                                                                 |
| 1,4- dioxane | 10.02                                                                                 |
| DCM          | 9.93                                                                                  |
| THF          | 9.52                                                                                  |

Figure S15: Hansen solubility parameter of the solvents used.

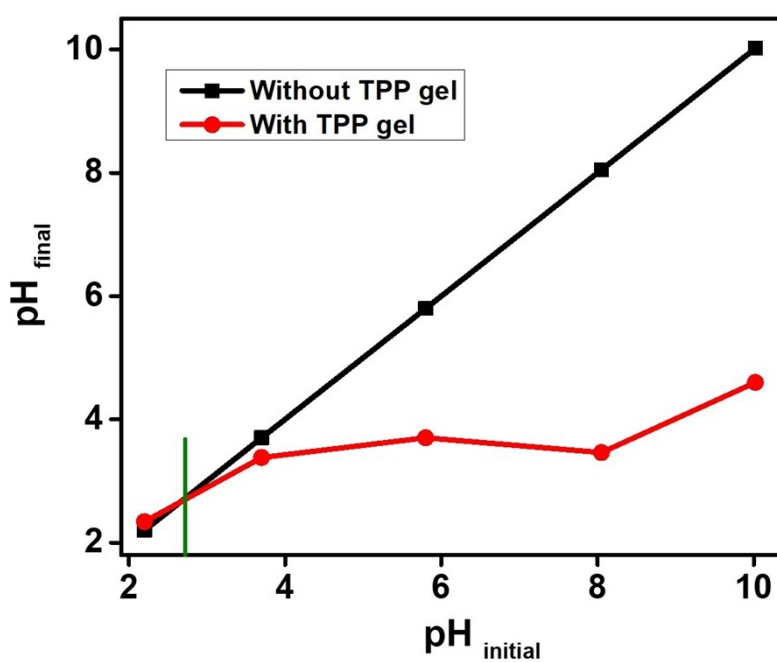

Figure S16: pHzpc data of the TPP gel.

**Equation S1:** Formula for dye adsorption

$$\text{dye removal (\%)} = \frac{C_0 - C_t}{C_0} \times 100$$

where  $C_0$  (mg/L) and  $C_t$  (mg/L) represent the initial and final (or at time t) concentration of dye in aqueous solution.

**Table S1. Adsorption capacity of different chemical adsorbents for the removal of azo dyes as recognised by their maximum adsorption capacity (mg of dye/g of adsorbent)**

| Adsorbent                                        | Dye sorbate   | Maximum removal efficiency (mg/g) | Reference |
|--------------------------------------------------|---------------|-----------------------------------|-----------|
| Granular activated carbon                        | Congo red     | 9.1                               | 1         |
| Zeolite                                          | DB 71         | 13.7                              | 2         |
| Graphene oxide                                   | acid orange 8 | 29.0                              | 3         |
| Cellulose/chitosan hydrogel                      | Congo red     | 40                                | 4         |
| Chitosan halloysite nanotubes                    | Congo red     | 41.5                              | 5         |
| Magnetic graphene/chitosan (MGCh) nanocomposite  | Acid orange 7 | 42.7                              | 6         |
| Chemically modified brown macroalga              | Acid orange 2 | 45.47                             | 7         |
| Amberlite IRA-958                                | Acid orange 7 | 50                                | 8         |
| Multiwalled carbon nanotube                      | tartrazine    | 84.0                              | 9         |
| Thiol-norbornene based photo crosslinked network | Acid orange 7 | 98.6                              | This work |
| Graphitized and heteroatom doped porous carbon   | Acid orange 7 | 285.71                            | 10        |

**Table S2. Adsorption capacity of different bio-adsorbents for the removal of azo dye acid orange 7 as recognised by their maximum adsorption capacity (mg of dye/g of adsorbent)**

| Adsorbent                                         | Dye sorbate    | Maximum removal efficiency (mg/g) | Reference |
|---------------------------------------------------|----------------|-----------------------------------|-----------|
| PR leaves                                         | Acid orange 7  | 7.52                              | 11        |
| Paulownia tomentosa Steud leaf powder             | Acid orange 52 | 10.5                              | 12        |
| Canola stalks (CS)                                | Acid orange 7  | 25.06                             | 13        |
| Spent brewery grains                              | Orange II      | 28.54                             | 14        |
| Brown macro alga <i>Stoechospermum marginatum</i> | Acid orange 7  | 35.62                             | 15        |

References:

- 1 D. Olivo-Alanis, R. B. Garcia-Reyes, L. H. Alvarez and A. Garcia-Gonzalez, *J. Hazard. Mater.*, 2018, **347**, 423.
- 2 N. Mirzaei, A. H. Mahvi and H. Hossini, *Adsorpt. Sci. Technol.*, 2018, **36**, 80.
- 3 W. Konicki, M. Aleksandrak, D. Moszyński and E. Mijowska, *J. Colloid Interface Sci.*, 2017, **496**, 188.
- 4 M. Li, Z. Wang and B. Li, *Desalin. Water Treat.*, 2016, **57**, 16970.
- 5 S. Vahidhabanu, A. I. Adeogun and B. R. Babu, *ACS Omega*, 2019, **4**, 2425.
- 6 S. Sheshmani, A. Ashori and S. Hasanzadeh, *Int. J. Biol. Macromol.*, 2014, **68**, 218.
- 7 M. Kousha, E. Daneshvar, M. S. Sohrabi, M. Jokar and A. Bhatnagar, *Chem. Eng. J.*, 2012, **192**, 67.
- 8 M. Greluk and Z. Hubicki, *Desalination*, 2011, **278**, 219.

- 9 J. Goscianska and R. Pietrzak, *Catal. Today*, 2015, **249**, 259.
- 10 Z. Liu, F. Zhang, T. Liu, N. Peng and C. Gai, *J. Environ. Manage.*, 2016, **182**, 446.
- 11 R. Rehman, S. J. Muhammad and M. Arshad, 2019, 1.
- 12 F. Deniz and S. D. Saygideger, *Bioresour. Technol.*, 2010, **101**, 5137.
- 13 Y. Hamzeh, A. Ashori, E. Azadeh and A. Abdulkhani, *Mater. Sci. Eng. C*, 2012, **32**, 1394.
- 14 E. R. García, R. L. Medina, M. M. Lozano, I. H. Pérez, M. J. Valero and A. M. Maubert Franco, *Materials (Basel)*, 2014, **7**, 8037.
- 15 M. Kousha, E. Daneshvar, M. S. Sohrabi, M. Jokar and A. Bhatnagar, *Chem. Eng. J.*, 2012, **192**, 67.
